# Supplementary material for: Hydrological effects of climate variability and vegetation dynamics on annual fluvial water balance in global large river basins
Source: Copernicus journal article supplement (doi:10.5194/hess-22-4047-2018), 2018-07-26
Supplement: Supplementary file 1 [file hess-22-4047-2018-supplement.pdf]

Supplement of Hydrol. Earth Syst. Sci., 22, 4047–4060, 2018  
<https://doi.org/10.5194/hess-22-4047-2018-supplement>  
© Author(s) 2018. This work is distributed under  
the Creative Commons Attribution 4.0 License.

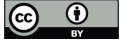

*Supplement of*

## **Hydrological effects of climate variability and vegetation dynamics on annual fluvial water balance in global large river basins**

**Jianyu Liu et al.**

*Correspondence to:* Qiang Zhang (zhangq68@bnu.edu.cn)

The copyright of individual parts of the supplement might differ from the CC BY 4.0 License.

**Table S1.** The validated parameter of eq. (14) and simulation accuracy of  $R$  based on the estimated  $n$  with the validated parameters for each basin

| ID | Validated basin | Model coefficients |         |          | $R$ simulation accuracy |      |      |
|----|-----------------|--------------------|---------|----------|-------------------------|------|------|
|    |                 | $a$                | $b$     | $c$      | $R^2$                   | RMSE | MAE  |
| 1  | Amur            | 5.05               | -0.36   | -0.05    | 0.90                    | 32.7 | 26.4 |
| 2  | Aral            | 0.39*              | 0.77*   | 0.04     | 0.80                    | 7.9  | 6.1  |
| 3  | Columbia        | 0.58***            | 0.47    | -0.06    | 0.27                    | 12.2 | 9.9  |
| 4  | Congo           | 0.92               | 0.10    | -0.36*** | 0.94                    | 12.8 | 10.7 |
| 5  | Danube          | 0.42               | 0.81    | -0.21    | 0.22                    | 39.4 | 35.4 |
| 6  | Indigirka       | 0.02               | 2.37*** | -0.02    | 0.85                    | 16.1 | 13.1 |
| 7  | Indus           | 0.26*              | 0.57    | 0.59*    | 0.82                    | 11.6 | 9.3  |
| 8  | Kolyma          | 0.34*              | 0.98**  | -0.20    | 0.60                    | 19.2 | 16.5 |
| 9  | Lena            | 0.39***            | 0.71**  | 0.19     | 0.84                    | 9.0  | 7.1  |
| 10 | Mackenzie       | 0.28*              | 0.91**  | -0.04    | 0.95                    | 6.3  | 5.2  |
| 11 | Mississippi     | 1.06*              | -0.03   | 0.00     | 0.81                    | 8.9  | 6.9  |
| 12 | Niger           | 0.03               | 2.22*   | 0.03     | 0.63                    | 24.3 | 18.3 |
| 13 | Nile            | 0.99***            | -0.17   | 0.06     | 0.80                    | 14.1 | 10.4 |
| 14 | Northern Dvina  | 1.53*              | -0.33   | -0.01    | 0.64                    | 10.8 | 8.9  |
| 15 | Ob              | 0.34               | 0.61    | 0.30**   | 0.85                    | 14.3 | 11.5 |
| 16 | Olenek          | 0.33               | 0.76*   | 0.10     | 0.82                    | 10.3 | 8.4  |
| 17 | Parana          | 0.35***            | 0.60*   | 0.39     | 0.76                    | 11.4 | 8.3  |
| 18 | Pearl           | 2.90               | -0.10   | -0.16**  | 0.80                    | 15.7 | 12.9 |
| 19 | Pechora         | 0.09               | 1.40*   | -0.01    | 0.97                    | 21.8 | 17.2 |
| 20 | Senegal         | 0.44               | 0.44    | 0.06     | 0.87                    | 16.5 | 13.1 |
| 21 | Volga           | 1.48***            | -0.04   | -0.41*   | 0.82                    | 4.0  | 3.3  |
| 22 | Yangtze         | 0.29               | 0.87    | -0.02    | 0.76                    | 13.4 | 10.3 |
| 23 | Yellow          | 0.45               | 0.30    | -0.06    | 0.92                    | 19.3 | 15.6 |
| 24 | Yenisei         | 0.86               | 0.28    | -0.01    | 0.58                    | 11.0 | 9.1  |
| 25 | Yukon           | 0.32               | 0.79*   | 0.02     | 0.80                    | 6.0  | 4.7  |
| 26 | Amur            | 0.13               | 1.06    | 0.12     | 0.43                    | 16.4 | 14.4 |
|    | All basins      | 0.29***            | 0.86*** | -3.3***  | 0.92                    | 68.2 | 45.8 |

‘\*’, ‘\*\*’ and ‘\*\*\*’ represent the validated parameter are significant at the level of  $p = 0.1$ ,  $p = 0.05$  and  $p = 0.01$ , respectively.

**Table S2.** The validated parameter for the cross-variation of  $n$ .

| ID | Validated basin | $a$     | $b$     | $c$      | ID | Validated basin | $a$     | $b$     | $c$      |
|----|-----------------|---------|---------|----------|----|-----------------|---------|---------|----------|
| 1  | Amur            | 0.28*** | 0.88*** | -0.32*** | 14 | Northern Dvina  | 0.29*** | 0.86*** | -0.33*** |
| 2  | Aral            | 0.28*** | 0.87*** | -0.33*** | 15 | Ob              | 0.28*** | 0.90*** | -0.29*** |
| 3  | Columbia        | 0.27*** | 0.90*** | -0.31*** | 16 | Olenek          | 0.29*** | 0.86*** | -0.33*** |
| 4  | Congo           | 0.29*** | 0.86*** | -0.32*** | 17 | Parana          | 0.28*** | 0.87*** | -0.33*** |
| 5  | Danube          | 0.29*** | 0.88*** | -0.13*** | 18 | Pearl           | 0.32*** | 0.77*** | -0.36*** |
| 6  | Indigirka       | 0.29*** | 0.85*** | -0.33*** | 19 | Pechora         | 0.29*** | 0.87*** | -0.32*** |
| 7  | Indus           | 0.29*** | 0.86*** | -0.33*** | 20 | Senegal         | 0.30*** | 0.83*** | -0.33*** |
| 8  | Kolyma          | 0.27*** | 0.88*** | -0.32*** | 21 | Volga           | 0.26*** | 0.91*** | -0.33*** |
| 9  | Lena            | 0.28*** | 0.88*** | -0.32*** | 22 | Yangtze         | 0.29*** | 0.85*** | -0.34*** |
| 10 | Mackenzie       | 0.29*** | 0.86*** | -0.33*** | 23 | Yellow          | 0.34*** | 0.76*** | -0.39*** |
| 11 | Mississippi     | 0.29*** | 0.86*** | -0.33*** | 24 | Yenisei         | 0.26*** | 0.90*** | -0.32*** |
| 12 | Niger           | 0.29*** | 0.86*** | -0.33*** | 25 | Yukon           | 0.29*** | 0.85*** | -0.33*** |
| 13 | Nile            | 0.28*** | 0.87*** | -0.33*** | 26 | Amur            | 0.30*** | 0.83*** | -0.32*** |

‘\*\*\*’ represent the validated parameter are significant at the level of  $p = 0.01$

**Table S3.** The change points of runoff and the change rates of meteorological and vegetative factors after change points

| ID | Basin             | Changepoint<br>of $R$ | $R$   | $E$   | $Pe$  | $PET$ | $n$   | $NDVI$ | $SI$  |
|----|-------------------|-----------------------|-------|-------|-------|-------|-------|--------|-------|
| 1  | Amazon            | 1998                  | 8.5   | -1.0  | 3.4   | 1.1   | -9.4  | 3.4    | 0.3   |
| 2  | Amur              | 1998                  | -16.4 | -0.3  | -5.8  | 3.0   | 4.5   | -1.3   | 24.9  |
| 3  | Aral              | 1994                  | -14.8 | 12.8  | 5.2   | 3.8   | 12.4  | -0.8   | -6.1  |
| 4  | Columbia          | 1999                  | -10.7 | 1.2   | -4.4  | 4.2   | 2.1   | -1.7   | 15.7  |
| 5  | Congo             | 1997                  | 4.1   | -2.5  | -0.8  | 0.7   | -15.5 | 1.0    | 3.5   |
| 6  | Danube            | 1988                  | -12.5 | 16.4  | 5.2   | 5.5   | 27.3  | 6.4    | 1.4   |
| 7  | Indigirka         | 1990                  | -7.0  | 4.4   | -3.4  | 2.4   | 5.0   | 5.5    | 5.1   |
| 8  | Indus             | 1998                  | -16.7 | -4.5  | -9.0  | 1.7   | 2.3   | 3.4    | 24.6  |
| 9  | Kolyma            | 1990                  | -9.6  | 0.4   | -5.0  | 0.9   | 3.7   | 4.2    | 16.9  |
| 10 | Lena              | 1995                  | 14.3  | 4.7   | 9.2   | -1.3  | 0.3   | 1.1    | -3.8  |
| 11 | Mackenzie         | 1989                  | -13.3 | 6.2   | -3.5  | 2.3   | 10.5  | -2.7   | 13.1  |
| 12 | Mississippi       | 1998                  | -20.1 | 5.0   | -2.0  | 0.0   | 15.1  | 1.3    | 8.7   |
| 13 | Niger             | 1990                  | 27.9  | 7.7   | 13.7  | 0.6   | -2.6  | 6.5    | -4.1  |
| 14 | Nile              | 1995                  | 14.7  | 3.2   | 5.7   | 1.9   | -2.9  | 3.1    | 12.5  |
| 15 | Northern<br>Dvina | 2000                  | -7.1  | 6.7   | -1.1  | 2.2   | 9.4   | 1.3    | 8.5   |
| 16 | Ob                | 1998                  | 7.5   | 4.7   | 5.9   | 1.8   | 0.9   | -0.8   | -7.0  |
| 17 | Olenek            | 1988                  | 13.9  | 10.7  | 12.6  | -1.9  | 4.5   | 6.2    | -20.5 |
| 18 | Parana            | 1998                  | -6.6  | 2.0   | 0.1   | 1.6   | 4.6   | -1.1   | 2.9   |
| 19 | Pearl             | 1991                  | 16.3  | 2.9   | 10.1  | -0.7  | -0.5  | -1.6   | 19.0  |
| 20 | Pechora           | 1990                  | 20.4  | -3.9  | 11.1  | 0.7   | -10.2 | 2.7    | -12.4 |
| 21 | Senegal           | 1993                  | 28.3  | 15.3  | 16.9  | 0.9   | 1.7   | 7.6    | -9.3  |
| 22 | Volga             | 1994                  | -8.9  | 4.1   | -1.2  | 2.3   | 6.8   | 3.8    | 1.6   |
| 23 | Yangtze           | 2000                  | -4.5  | 5.9   | -0.6  | 3.0   | 5.2   | -0.3   | -3.2  |
| 24 | Yellow            | 1990                  | -10.1 | 3.2   | -0.3  | 2.9   | 5.1   | 2.6    | 24.2  |
| 25 | Yenisei           | 1996                  | 2.1   | 3.9   | 3.1   | 1.1   | 2.3   | 1.6    | 12.1  |
| 26 | Yukon             | 1994                  | -8.0  | -28.4 | -15.6 | 2.2   | -18.9 | -3.4   | 8.9   |

**Table S4.** Contributions to the long-term mean changes of  $R$  and  $E$  from  $P_e$ , SAI, M and  $E_0$  changes.

| ID | Basins         | Contributions to $R$ changes |       |       |      | Contributions to $E$ changes |       |       |       |
|----|----------------|------------------------------|-------|-------|------|------------------------------|-------|-------|-------|
|    |                | P                            | E0    | M     | SSI  | P                            | E0    | M     | SSI   |
| 1  | Amazon         | 63.7                         | -10.1 | 25.5  | -0.7 | 19.8                         | 22.3  | 55.4  | -2.5  |
| 2  | Amur           | -59.9                        | -11.2 | 4.2   | 24.6 | -51.7                        | 13.5  | 13.6  | 21.2  |
| 3  | Aral           | -13.2                        | -9.3  | -21.4 | 56.1 | 33.9                         | 7.0   | -10.1 | 48.9  |
| 4  | Columbia       | -69.3                        | -15.5 | 4.0   | 11.2 | -44.5                        | 28.1  | 11.5  | 15.9  |
| 5  | Congo          | 26.2                         | -8.1  | -30.8 | 34.9 | -7.8                         | 10.1  | -37.7 | 44.4  |
| 6  | Danube         | 17.3                         | -19.0 | 59.4  | -4.4 | 17.8                         | 18.9  | 51.1  | 12.2  |
| 7  | Indigirka      | -54.3                        | -6.5  | 30.2  | -9.0 | -21.4                        | 11.2  | 58.0  | 9.4   |
| 8  | Indus          | -82.8                        | -3.8  | -4.2  | 9.1  | -74.7                        | 5.6   | 15.1  | -4.6  |
| 9  | Kolyma         | -67.0                        | -3.7  | -13.3 | 16.0 | -45.6                        | 6.1   | 31.2  | -17.0 |
| 10 | Lena           | 94.7                         | 3.8   | 0.7   | 0.8  | 85.3                         | -10.6 | -0.7  | 3.5   |
| 11 | Mackenzie      | -54.1                        | -6.2  | 16.5  | 23.3 | -20.1                        | 10.7  | 64.3  | -4.8  |
| 12 | Mississippi    | -36.8                        | -0.2  | -20.4 | 42.7 | -17.4                        | 0.2   | 51.5  | -30.9 |
| 13 | Niger          | 79.1                         | -1.6  | 15.9  | 3.5  | 81.4                         | 1.4   | 15.6  | 1.6   |
| 14 | Nile           | 61.8                         | -8.1  | -13.4 | 16.7 | 68.1                         | 6.8   | -11.2 | 13.9  |
| 15 | Northern Dvina | -29.0                        | -11.7 | -19.8 | 39.6 | -6.1                         | 15.4  | 39.3  | -39.2 |
| 16 | Ob             | 83.5                         | -9.5  | -1.9  | 5.2  | 70.1                         | 17.1  | 7.1   | -5.7  |
| 17 | Olenek         | 82.5                         | 2.9   | 6.2   | 8.4  | 54.2                         | -7.5  | 34.0  | -4.3  |
| 18 | Parana         | -25.0                        | -29.2 | 24.7  | 21.1 | 2.2                          | 38.1  | 27.0  | 32.7  |
| 19 | Pearl          | 96.4                         | 2.2   | 0.3   | 1.1  | 83.5                         | -9.8  | 1.8   | 5.0   |
| 20 | Pechora        | 76.6                         | -0.9  | 8.4   | 14.1 | 30.7                         | 2.7   | 52.3  | -14.3 |
| 21 | Senegal        | 86.4                         | -2.2  | 7.9   | 3.5  | 94.6                         | 0.9   | 4.5   | 0.0   |
| 22 | Volga          | -41.3                        | -13.5 | 39.6  | -5.6 | -12.0                        | 20.2  | 49.6  | 18.1  |
| 23 | Yangtze        | -26.2                        | -19.1 | -11.6 | 43.1 | -4.6                         | 24.6  | -19.8 | 51.0  |
| 24 | Yellow         | -10.9                        | -22.1 | -18.6 | 48.4 | -6.4                         | 23.2  | -20.8 | 49.6  |
| 25 | Yenisei        | 60.7                         | -10.0 | -8.7  | 20.6 | 42.2                         | 14.7  | -11.4 | 31.7  |
| 26 | Yukon          | -63.8                        | -1.3  | 19.6  | 15.3 | -25.7                        | 2.6   | -20.8 | 50.9  |
